# Supplementary material
Source: PubMed Central journal article supplement (PMC4693849)
Supplement: HESR-50-1973-s002.pdf [file HESR-50-1973-s002.pdf]

**TECHNICAL APPENDIX**

**Measurement Error in Public Health Insurance Reporting in the American Community Survey:  
Evidence from Record Linkage**

Michel H. Boudreaux, Kathleen T. Call, Joanna Turner, Brett Fried, Brett O'Hara

**Technical Appendix:**  
**Measurement Error in Public Health Insurance Reporting in the American Community Survey: Evidence from Record Linkage**

This appendix provides supplementary information on methods and results that are not included in the main paper. The referenced Appendix tables and figures are included at the end of the document.

**The 2009 ACS Health Insurance Question**

The 2009 ACS health insurance question is presented in Appendix Figure 1 (located at end of document). The Medicaid Plus variable is captured by response item [d.].

**Determining Enrollment Status on the Day of Interview**

The MSIS tracks days of enrollment per month and the ACS tracks coverage held on the specific day of interview. To infer whether an ACS case was enrolled on the day of interview we borrowed an approach previously used in a record-check study of the National Health Interview Survey.<sup>1</sup> If an ACS record was shown in the MSIS to be enrolled for the entire month in which the ACS interview was conducted we code the person as enrolled. Similarly, if the case had 0 days of enrollment in the interview month we considered the case to lack enrollment on the interview date. When MSIS indicated enrollment for only part of the interview month we used the following procedure to determine enrollment on the day of interview: 1) If MSIS indicated enrollment for the entire month prior to interview, but no enrollment in the month subsequent to interview, then we assumed the interview month enrollment period occurred at the beginning of the month. We considered the ACS record to be enrolled if the interview date occurred in the assumed interview month enrollment period. For example, if an ACS interview occurred on August 5 and in MSIS the individual was enrolled all of July and for 10 days in August then we would consider the individual enrolled. 2) If MSIS suggests enrollment for the entire month after interview, but for no days in the month prior to interview, we assume the enrollment period occurred at the end of the month and consider the ACS record to be enrolled if the interview date occurred in the assumed enrollment period. For example, if an ACS interview occurred on August 25 and in MSIS the individual was enrolled all of September and for 10 days in August we would consider the individual enrolled 3) In the rare cases where the MSIS indicates no (or partial) enrollment in the month prior and no (or partial) enrollment in the month subsequent to interview, we calculated the probability that a continuous eligibility period, lasting for a length indicated by the days of enrollment variable, covered the interview date. We then imputed enrollment by comparing this probability to a random draw from a uniform distribution. The enrollment status of the overwhelming majority of ACS cases (99.3%) was obtained because the MSIS suggested full or no enrollment in the month of interview.

---

<sup>1</sup> SNACC Phase IV Research Results. Available at:  
[http://www.census.gov/did/www/snacc/docs/SNACC\\_Phase\\_IV\\_Full\\_Report.pdf](http://www.census.gov/did/www/snacc/docs/SNACC_Phase_IV_Full_Report.pdf)

### **Appendix Table 1: Adjusted Weights**

We adjusted the ACS sample weights to account for missing Protected Identification Keys (PIKs) in the ACS (9.2% were missing). The original sample weight was adjusted by the ratio of the population estimate in the full ACS file to the population estimate from the subsample with valid PIKs. Population estimates were produced for subgroups defined by cross-classifying state (51 jurisdictions), age (0-18, 19-64, 65+), race (Non-Hispanic White, Non-Hispanic Non-White, Hispanic), poverty status (0-199, 200+), and health insurance status (Any Medicaid Plus, Any Other Coverage, Uninsured). A small minority of strata were collapsed when the cross-classified cells had exceedingly small sample sizes.

Appendix Table 1 describes the characteristics of the full sample using the original weight (column A), the characteristics of the subsample that had a valid PIK using the original weight (column B), the characteristics of the subsample with a valid PIK using the adjusted weight (column C), and the characteristics of the sample without a PIK (column D). For the most part, the estimate using the adjusted weight mirrored the original estimates from the full file, reducing the bias present when comparing columns A and B. The largest difference between the original and adjusted estimates was 1.5 percentage points for citizenship status. We did not include citizenship status in the weighting routine because it would have produced an overabundance of small cells. However, for most of the characteristics that we examine in the main paper, including insurance coverage, race, age and poverty, the difference between the original and adjusted estimates was small.

### **Appendix Table 2. False-Negative Rates by Weight for Selected Demographic Groups**

Appendix Table 2 presents false-negative rates from the linked file using the original ACS sample weight and the adjusted rate. We have omitted standard errors and statistical testing from the table because the estimates for the adjusted and original sample weight are highly correlated and thus all differences are strongly significant. The adjusted rate produces a slightly higher false-negative rate than the original sample weight and this finding is consistent across sub-groups.

### **Appendix Table 3. Health Insurance Coverage by Residency Type**

In the main paper, the estimates described in Tables 2 and 3 and Figures 1 and 2 are for the civilian non-institutional population. However, the ACS also collects health insurance information from people residing in institutional group quarters. Both the population residing in group quarters and the survey methods used to interview group quarters residents differs from the population in housing units. Therefore, it is plausible that the false-negative rate could also differ. Appendix Table 3 describes the distribution of health insurance in the ACS among linked cases, by residency type. The percent of linked cases that are not coded to Medicaid Plus varies across residency type at a statistically significant level ( $p=0.03$ ), but the variation does not appear to be substantively meaningful. The false negative rate among housing unit residents is 21.6%, among non-institutional residents it is 20.4% and among institutional residents is 20.2%. However, there are starker differences in reports of uninsurance among known Medicaid Plus enrollees, with 9.1% of housing unit residents recorded as uninsured compared to 4.4% and 5.2% among non-institutional residents and institutional residents respectively.

### **Appendix Table 4a and 4b. Unadjusted and Regression Adjusted False-Negative Rates for Children and Adults, 2009 ACS/MSIS Linked File**

Appendix Table 4a describes the data underlying the maps in Figures 1 and 2. The adjusted estimates were obtained from a logistic regression and predicted probabilities were produced using average marginal effects. The regression model included controls for race, gender, poverty, citizenship, household employment and education, and state. The results are discussed in the main manuscript.

#### **Appendix Table 4b. Summary Statistics for Unadjusted and Adjusted State False-Negative Rates**

Appendix Table 4b presents summary statistics calculated from the estimates tabulated in Appendix Table 4a. The measures of spread are discussed in the main manuscript. We also show the average false-negative rate across CHIP type (stand-alone, expansion, combination). Readers will note that across CHIP types our data includes similar sets of enrollees: Medicaid enrollees in every state and expansion CHIP enrollees in combination and expansion only states. Table 4b gives an idea of reporting patterns for these common enrollees by CHIP type. We find no variation across states in the false-negative rate for children. After adjusting for demographics, expansion states have a lower average rate compared to stand-alone or combination states, but given the number of expansion states is small it is hard to be confident in this difference. On an unadjusted basis, adults have worse reporting in stand-alone states. The difference between stand-alone and combination states vanishes after adjustment, but expansion only states remain unique.

#### **Appendix Table 5. Logistic Regression Coefficients Predicting False-Negative Reports for Children and Adults, Demographics and State Dummy Model**

Appendix Table 5 reports the coefficients from the logistic regression model used to produce the adjusted rates in Appendix Table 4a.

#### **Appendix Table 6. Logistic Regression Coefficients Predicting False-Negative Reports for Children and Adults, Demographics and State Program Models**

In Appendix Table 6 we report the coefficients from models of false-negative reports for children and adults on demographics (described above) and state program characteristics. State program characteristics included program name complexity, the income eligibility of children and adults (high, medium, low), if childless adults were covered, CHIP program type (stand-alone, expansion, or combination), and the presumptive eligibility policies (none, pregnant women only, pregnant women and children). Data was obtained from Kaiser (2009). Our interpretation of results is included in the main body of the text.

#### **Appendix Tables 7 and 8. Nested Logistic Regression Results.**

Appendix Tables 7 and 8 present the results from nested logistic regressions run on a pooled sample of the 2008 and 2009 ACS that has been merged to enrollment records from the MSIS.<sup>2</sup> Only linked cases are included in the estimation sample, the adjusted weights are used, and the standard errors account for the complexity of the sample design. The first block of variables included age, race, poverty and survey year, the second block included state of residence, and the third block included the interaction of state and categorical year. Appendix Table 7 presents results from predicting a 0/1 variable that indicates not being coded to Medicaid Plus and Appendix Table 8 presents results from predicting uninsured status.

The right most panel of Appendix Table 7 (Model 3), which includes the full set of covariates, shows that young, white, and lower-income individuals were less likely to be undercounted. This is the same conclusion drawn from the unadjusted estimates presented in Table 3 of the main paper. Appendix Table 7 also indicates that the false negative rate is lower in 2009 than in 2008.

Similar to the Appendix Table 4, the regressions in Appendix Table 7 (Model 3) suggested that in the pooled 2008-2009 data, there was wide variation in the false negative rate across the states, even after controlling for demographics. The coefficients for 26 of the state dummy variables were statistically significant (Alabama was arbitrarily chosen as the referent state) and for the vast majority of states the coefficient was positive. More importantly, the F test on the block of state dummy variables was

---

<sup>2</sup> The 2008 file was merged to the MSIS and weighted using the same methods as the 2009 file. For more 2008 specific results, see [http://www.shadac.org/files/shadac/publications/ACSUndercount\\_WorkingPaper\\_0.pdf](http://www.shadac.org/files/shadac/publications/ACSUndercount_WorkingPaper_0.pdf)

significant ( $p < 0.001$ ), suggesting that the effect of state as a construct was statistically significant, controlling for demographics and year of interview. The third block of variables that included the full set of state-by-time effects was also significant ( $p < 0.001$ ) suggesting that the effect of state varies by year (or the effect of year varies by state). In the main paper we discuss the implication of this finding to difference-in-difference evaluations of state driven Medicaid policy changes.

Appendix Table 8 shows that non-elderly adults were more likely to be coded as uninsured compared to children, but the elderly were less likely to be uninsured. This follows the pattern of results shown in Table 3 of the main paper. The regression showed that those in the highest poverty level were more likely than those under 138% of FPL to be uninsured ( $p < 0.001$ ). This is a different pattern of results compared to the unadjusted analysis in Table 3. The most interesting result from Appendix Table 8 is that while the year dummy variable was statistically significant as was the block of state dummy variables, the final block of state-by-year interaction effects was not (unlike Appendix Table 7). This suggests that the effect of state on uninsurance for known enrollees does not vary by year.

#### **Appendix Table 9. False-Positive Error Rate, 2009 ACS/MSIS Linked File**

For completeness, Appendix Table 9 reports the share of cases that are coded as having Medicaid Plus in the 2009 ACS that we determined were not enrolled on the day of interview, per MSIS. As described in the main text we have no ability to decompose the fraction of these “over-counted” cases that are true false-positives and what fraction are correctly reporting other relevant coverage either not included in the MSIS (e.g., state-sponsored insurance) or are simply absent from the linked data because of missing MSIS PIKs. The first column tabulates Medicaid Plus responses from the ACS for cases that the MSIS shows are not enrolled on the date of interview. For this population, the false-positive rate is 7.1%. The second two columns split the unlinked population into two exhaustive and mutually exclusive groups. The first are cases that are never on the MSIS during our observation window. The false-positive rate for that group is 4.8%. The final column shows the false-positive rate for people that we do find on the MSIS, but who are not enrolled on the specific date of interview. The false-positive rate in that group is much higher: 41.7%. The large false-positive rate in the final group could be caused by error on the MSIS in the timing of enrollment or by confusion among respondents regarding the termination of their benefits.

Appendix Figure 1. 2009 ACS Health Insurance Question (Housing Unit Questionnaire)

**16** Is this person **CURRENTLY** covered by any of the following types of health insurance or health coverage plans? Mark "Yes" or "No" for EACH type of coverage in items a – h.

|                                                                                                                       | Yes                      | No                       |
|-----------------------------------------------------------------------------------------------------------------------|--------------------------|--------------------------|
| a. Insurance through a current or former employer or union (of this person or another family member)                  | <input type="checkbox"/> | <input type="checkbox"/> |
| b. Insurance purchased directly from an insurance company (by this person or another family member)                   | <input type="checkbox"/> | <input type="checkbox"/> |
| c. Medicare, for people 65 and older, or people with certain disabilities                                             | <input type="checkbox"/> | <input type="checkbox"/> |
| d. Medicaid, Medical Assistance, or any kind of government-assistance plan for those with low incomes or a disability | <input type="checkbox"/> | <input type="checkbox"/> |
| e. TRICARE or other military health care                                                                              | <input type="checkbox"/> | <input type="checkbox"/> |
| f. VA (including those who have ever used or enrolled for VA health care)                                             | <input type="checkbox"/> | <input type="checkbox"/> |
| g. Indian Health Service                                                                                              | <input type="checkbox"/> | <input type="checkbox"/> |
| h. Any other type of health insurance or health coverage plan – <i>Specify</i>                                        | <input type="checkbox"/> | <input type="checkbox"/> |

Notes:

The complete housing unit and group quarters questionnaires are available at: [http://www.census.gov/acs/www/methodology/questionnaire\\_archive](http://www.census.gov/acs/www/methodology/questionnaire_archive)

The 2009 ACS Instruction guide states: “Mark the ‘Yes’ or ‘No’ box for each part of question 16. If the person reports any other type of coverage plan in 16h, specify the type of coverage or name of the plan in the write-in box. DO NOT include plans that cover only one type of health care (such as dental plans) or plans that only cover a person in case of an accident or disability.”

**Appendix Table 1. Distribution of Demographics and Health Insurance Status, by Sample and Weighting Strategy, 2009 ACS**

|                           | Full Sample         | PIK Sample          |                     | Non-PIK Sample      |      |
|---------------------------|---------------------|---------------------|---------------------|---------------------|------|
|                           | Original Weight (A) | Original Weight (B) | Adjusted Weight (C) | Original Weight (D) | A-C  |
| <b>Selected States</b>    |                     |                     |                     |                     |      |
| CA                        | 12.0                | 11.4                | 12.0                | 16.8                | 0.0  |
| NM                        | 0.7                 | 0.6                 | 0.7                 | 1.1                 | 0.0  |
| MS                        | 1.0                 | 1.0                 | 1.0                 | 0.8                 | 0.0  |
| MN                        | 1.7                 | 1.8                 | 1.7                 | 1.1                 | 0.0  |
| MA                        | 2.2                 | 2.2                 | 2.2                 | 1.7                 | 0.0  |
| All Other States          | 82.5                | 83.0                | 82.5                | 78.6                | 0.0  |
| <b>Sex</b>                |                     |                     |                     |                     |      |
| Female                    | 50.7                | 50.9                | 50.7                | 49.2                | -0.1 |
| Male                      | 49.3                | 49.1                | 49.3                | 50.8                | 0.1  |
| <b>Age group</b>          |                     |                     |                     |                     |      |
| 0-5                       | 8.2                 | 7.6                 | 7.8                 | 13.0                | 0.4  |
| 6-14                      | 11.9                | 11.8                | 12.1                | 13.2                | -0.2 |
| 15-18                     | 4.1                 | 4.1                 | 4.2                 | 4.3                 | -0.1 |
| 19-44                     | 37.0                | 35.9                | 36.5                | 45.1                | 0.5  |
| 45-64                     | 25.9                | 27.0                | 26.5                | 17.6                | -0.6 |
| 65+                       | 12.9                | 13.7                | 12.9                | 6.8                 | 0.0  |
| <b>Race</b>               |                     |                     |                     |                     |      |
| White Alone               | 75.9                | 77.4                | 76.1                | 64.8                | -0.2 |
| Black Alone               | 12.8                | 12.5                | 12.9                | 15.3                | 0.0  |
| AIAN Alone                | 1.2                 | 1.1                 | 1.2                 | 1.6                 | 0.0  |
| Asian/NHOPI Alone         | 5.0                 | 4.8                 | 5.0                 | 6.3                 | 0.0  |
| Other or Mult             | 5.1                 | 4.2                 | 4.9                 | 12.1                | 0.2  |
| <b>Hispanic ethnicity</b> |                     |                     |                     |                     |      |
| Non Hispanic              | 83.8                | 86.2                | 84.0                | 65.6                | -0.2 |
| Hispanic                  | 16.2                | 13.8                | 16.0                | 34.4                | 0.2  |
| <b>Citizenship</b>        |                     |                     |                     |                     |      |
| Non-Citizen               | 13.3                | 10.9                | 11.9                | 31.3                | 1.5  |
| Citizen                   | 86.7                | 89.1                | 88.1                | 68.7                | -1.5 |
| <b>Residence</b>          |                     |                     |                     |                     |      |
| Housing Unit              | 97.3                | 97.5                | 97.3                | 96.3                | 0.0  |
| Group Quarters            | 2.7                 | 2.6                 | 2.7                 | 3.8                 | 0.0  |

|                          |      |      |      |      |      |
|--------------------------|------|------|------|------|------|
| <b>Poverty Group</b>     |      |      |      |      |      |
| 0-49                     | 6.1  | 5.3  | 5.7  | 11.9 | 0.4  |
| 50-74                    | 3.6  | 3.3  | 3.6  | 6.0  | 0.1  |
| 75-99                    | 4.2  | 3.9  | 4.2  | 6.6  | 0.0  |
| 100-124                  | 4.4  | 4.1  | 4.4  | 6.5  | 0.0  |
| 125-149                  | 4.6  | 4.3  | 4.6  | 6.5  | -0.1 |
| 150-174                  | 4.4  | 4.2  | 4.5  | 5.7  | -0.1 |
| 175-199                  | 4.5  | 4.4  | 4.7  | 5.3  | -0.2 |
| 200+                     | 65.5 | 67.9 | 65.6 | 47.8 | -0.1 |
| NIU                      | 2.6  | 2.5  | 2.6  | 3.7  | 0.0  |
| <b>Insured Status</b>    |      |      |      |      |      |
| Medicaid Only            | 11.6 | 11.0 | 11.6 | 16.5 | 0.1  |
| Medicaid In Combo        | 4.8  | 5.0  | 4.9  | 3.7  | -0.1 |
| Other Public Only        | 3.9  | 4.1  | 3.9  | 2.8  | 0.0  |
| Private Only             | 55.8 | 57.6 | 55.8 | 42.4 | 0.0  |
| Private and Other Public | 8.4  | 9.1  | 8.5  | 3.5  | -0.1 |
| Uninsured                | 15.4 | 13.2 | 15.4 | 31.2 | 0.0  |

Note: Values are rounded. Differences are based on two significant digits.

Source: 2009 American Community Survey.



**Appendix Table 2. False-Negative Rates by Weight for Selected Demographic Groups**

|                                       | Original Weight     | Adjusted Weight     |
|---------------------------------------|---------------------|---------------------|
| <b>Total</b>                          | 20.8                | 21.6                |
| <b>Age</b>                            |                     |                     |
| 0-18                                  | 17.3                | 17.7                |
| 19-64                                 | 24.8                | 26.6                |
| 65+                                   | 27.1                | 27.0                |
| <b>Race/ethnicity</b>                 |                     |                     |
| White, non-Hispanic                   | 19.3                | 19.3                |
| Black, non-Hispanic                   | 21.6                | 22.0                |
| AIAN, non-Hispanic                    | 23.1                | 24.4                |
| Asian/NHOPI, non-Hispanic             | 27.9                | 28.1                |
| Other/Mult, non-Hispanic              | 23.0                | 23.1                |
| Hispanic, any race                    | 21.2                | 23.4                |
| <b>Citizenship</b>                    |                     |                     |
| Non-Citizen                           | 34.0                | 38.4                |
| Citizen                               | 20.2                | 20.7                |
| <b>Poverty level</b>                  |                     |                     |
| 0-138                                 | 14.7                | 15.8                |
| 139-249                               | 27.1                | 28.0                |
| 250-399                               | 35.7                | 35.7                |
| 400+                                  | 39.0                | 39.1                |
| <b>Weighted Count of Linked Cases</b> | <b>32.3 million</b> | <b>38.6 million</b> |

Source: The 2009 linked ACS-MSIS, Civilian Non-Institutional Population.

**Appendix Table 3. Health Insurance Coverage in 2009 ACS by Residency Type, Linked Cases**

|                       | No Medicaid Plus |         | Any Medicaid Plus Coverage | Any Other Coverage | Uninsured  | P-Value |
|-----------------------|------------------|---------|----------------------------|--------------------|------------|---------|
|                       | % (SE)           | P Value | % (SE)                     | % (SE)             | % (SE)     |         |
| <b>Residence Type</b> |                  | 0.03    |                            |                    |            | 0.001   |
| Housing Units         | 21.6 (0.13)      |         | 78.4 (0.13)                | 12.5 (0.09)        | 9.1 (0.09) |         |
| Non-Inst GQ           | 20.4 (0.48)      |         | 79.6 (0.48)                | 16.1 (0.45)        | 4.4 (0.18) |         |
| Inst GQ               | 20.2 (0.87)      |         | 79.8 (0.87)                | 15.1 (0.64)        | 5.2 (0.55) |         |

Source: Re-weighted estimates from the 2009 linked ACS-MSIS.

**Appendix Table 4a. Unadjusted and Regression Adjusted False-Negative Rates for Children and Adults, 2009  
ACS/MSIS Linked File**

|                      | Children (0-18) |     |          |     | Adults (19 and Over) |     |          |     |
|----------------------|-----------------|-----|----------|-----|----------------------|-----|----------|-----|
|                      | Unadjusted      |     | Adjusted |     | Unadjusted           |     | Adjusted |     |
|                      | %               | SE  | %        | SE  | %                    | SE  | %        | SE  |
| ALABAMA              | 12.1            | 0.8 | 13.4     | 0.8 | 19.8                 | 1.0 | 22.8     | 1.1 |
| ALASKA               | 16.7            | 2.1 | 11.9     | 1.6 | 18.3                 | 2.4 | 17.5     | 2.4 |
| ARIZONA              | 20.2            | 1.3 | 20.1     | 1.3 | 34.2                 | 1.1 | 31.8     | 1.1 |
| ARKANSAS             | 12.5            | 0.9 | 13.4     | 0.9 | 24.9                 | 1.7 | 28.1     | 1.7 |
| CALIFORNIA           | 18.8            | 0.4 | 18.4     | 0.4 | 28.8                 | 0.4 | 25.0     | 0.4 |
| COLORADO             | 18.1            | 1.4 | 18.2     | 1.5 | 31.7                 | 1.8 | 31.3     | 1.7 |
| CONNECTICUT          | 18.6            | 1.3 | 15.7     | 1.2 | 26.3                 | 1.4 | 24.9     | 1.3 |
| DELAWARE             | 15.3            | 2.2 | 14.0     | 1.8 | 22.1                 | 2.1 | 21.6     | 1.9 |
| DISTRICT OF COLUMBIA | 17.4            | 2.7 | 15.2     | 2.2 | 20.3                 | 2.4 | 18.8     | 2.0 |
| FLORIDA              | 21.8            | 0.7 | 21.9     | 0.7 | 30.9                 | 0.7 | 29.3     | 0.7 |
| GEORGIA              | 20.6            | 0.8 | 21.4     | 0.8 | 33.4                 | 1.0 | 34.2     | 1.0 |
| HAWAII               | 19.7            | 1.9 | 13.4     | 1.5 | 28.7                 | 2.0 | 27.0     | 1.8 |
| IDAHO                | 15.5            | 1.7 | 17.1     | 1.8 | 23.5                 | 2.7 | 27.0     | 2.7 |
| ILLINOIS             | 18.4            | 0.6 | 17.5     | 0.6 | 33.3                 | 0.8 | 33.0     | 0.7 |
| INDIANA              | 18.4            | 0.9 | 19.9     | 0.9 | 28.4                 | 1.2 | 32.2     | 1.2 |
| IOWA                 | 16.4            | 1.1 | 17.3     | 1.1 | 22.6                 | 1.3 | 25.9     | 1.4 |
| KANSAS               | 17.1            | 1.3 | 18.9     | 1.2 | 22.3                 | 1.5 | 25.8     | 1.6 |
| KENTUCKY             | 13.6            | 1.0 | 15.9     | 1.1 | 20.9                 | 1.1 | 27.2     | 1.2 |
| LOUISIANA            | 18.8            | 0.9 | 17.5     | 0.9 | 32.1                 | 1.2 | 34.0     | 1.2 |
| MAINE                | 10.5            | 1.2 | 10.7     | 1.2 | 16.1                 | 1.0 | 19.3     | 1.2 |
| MARYLAND             | 21.4            | 1.1 | 17.3     | 0.9 | 31.9                 | 1.2 | 30.4     | 1.1 |
| MASSACHUSETTS        | 13.3            | 0.9 | 11.9     | 0.8 | 18.5                 | 0.7 | 18.7     | 0.7 |
| MICHIGAN             | 14.7            | 0.6 | 15.8     | 0.6 | 20.3                 | 0.7 | 23.1     | 0.7 |
| MINNESOTA            | 17.9            | 1.0 | 17.6     | 1.0 | 22.2                 | 0.7 | 24.2     | 0.8 |
| MISSISSIPPI          | 15.3            | 1.0 | 16.3     | 1.1 | 23.2                 | 1.2 | 25.7     | 1.2 |
| MISSOURI             | 14.8            | 0.8 | 16.0     | 0.9 | 23.5                 | 1.0 | 27.7     | 1.1 |
| MONTANA              | 18.0            | 2.6 | 19.5     | 2.5 | 28.2                 | 3.2 | 32.0     | 3.4 |
| NEBRASKA             | 12.1            | 1.3 | 12.4     | 1.3 | 19.2                 | 2.4 | 23.0     | 2.7 |
| NEVADA               | 25.5            | 2.5 | 25.1     | 2.4 | 33.5                 | 2.5 | 31.8     | 2.3 |

|                |      |     |      |     |      |     |      |     |
|----------------|------|-----|------|-----|------|-----|------|-----|
| NEW HAMPSHIRE  | 15.5 | 2.1 | 14.6 | 1.9 | 22.0 | 2.4 | 25.5 | 2.6 |
| NEW JERSEY     | 23.5 | 1.2 | 21.6 | 1.1 | 29.3 | 1.1 | 26.7 | 1.1 |
| NEW MEXICO     | 19.4 | 1.2 | 17.6 | 1.1 | 30.8 | 1.9 | 28.5 | 1.8 |
| NEW YORK       | 15.0 | 0.5 | 14.3 | 0.5 | 23.3 | 0.4 | 21.0 | 0.4 |
| NORTH CAROLINA | 14.9 | 0.7 | 15.4 | 0.8 | 23.3 | 0.8 | 25.8 | 0.9 |
| NORTH DAKOTA   | 18.6 | 3.4 | 18.0 | 3.1 | 22.0 | 3.8 | 25.6 | 4.1 |
| OHIO           | 15.9 | 0.5 | 17.6 | 0.5 | 20.3 | 0.6 | 24.2 | 0.6 |
| OKLAHOMA       | 17.0 | 1.1 | 17.1 | 1.1 | 33.5 | 1.2 | 36.9 | 1.3 |
| OREGON         | 15.5 | 1.2 | 16.7 | 1.3 | 25.8 | 1.6 | 28.7 | 1.7 |
| PENNSYLVANIA   | 17.7 | 0.7 | 17.4 | 0.6 | 24.8 | 0.6 | 27.2 | 0.6 |
| RHODE ISLAND   | 24.7 | 2.5 | 23.0 | 2.4 | 26.2 | 2.4 | 26.5 | 2.2 |
| SOUTH CAROLINA | 15.9 | 1.0 | 16.5 | 1.0 | 21.1 | 1.0 | 23.7 | 1.1 |
| SOUTH DAKOTA   | 17.9 | 2.3 | 17.5 | 2.2 | 22.5 | 3.2 | 25.6 | 3.6 |
| TENNESSEE      | 18.5 | 0.8 | 19.9 | 0.8 | 28.0 | 0.8 | 31.6 | 0.8 |
| TEXAS          | 18.5 | 0.5 | 19.5 | 0.5 | 33.2 | 0.7 | 31.0 | 0.7 |
| UTAH           | 16.4 | 1.8 | 16.3 | 1.8 | 24.5 | 2.2 | 25.9 | 2.2 |
| VERMONT        | 11.4 | 1.8 | 10.1 | 1.6 | 15.1 | 1.6 | 17.2 | 1.8 |
| VIRGINIA       | 23.4 | 1.0 | 22.6 | 0.9 | 23.3 | 1.1 | 25.1 | 1.2 |
| WASHINGTON     | 18.7 | 1.1 | 17.4 | 1.0 | 22.7 | 1.2 | 24.0 | 1.2 |
| WEST VIRGINIA  | 14.1 | 1.1 | 16.0 | 1.2 | 18.2 | 1.3 | 24.1 | 1.5 |
| WISCONSIN      | 14.8 | 0.8 | 15.2 | 0.8 | 28.3 | 0.8 | 30.8 | 0.8 |
| WYOMING        | 23.0 | 3.4 | 21.6 | 3.0 | 27.5 | 4.2 | 29.2 | 4.5 |

Source: Re-weighted estimates from the 2009 linked ACS-MSIS. Regression adjusted estimates are from logistic regression models that control for race, gender, poverty, citizenship, household education, household employment, and state. Predicted probabilities were obtained from average marginal effects.

**Appendix Table 4b. Summary Statistics for Unadjusted and Adjusted State False-Negative Rates**

|                                      | Children (0-18) |          | Adults (19 and Over) |          |
|--------------------------------------|-----------------|----------|----------------------|----------|
|                                      | Unadjusted      | Adjusted | Unadjusted           | Adjusted |
| Mean                                 | 17.3            | 17.0     | 25.2                 | 26.6     |
| SD                                   | 3.3             | 3.2      | 5.0                  | 4.4      |
| Min                                  | 10.5            | 10.1     | 15.1                 | 17.2     |
| Max                                  | 25.5            | 25.1     | 34.2                 | 36.9     |
| Range (Max-Min)                      | 15.0            | 15.0     | 19.1                 | 19.7     |
| Mean in CHIP Stand-Alone Only States | 17.6            | 17.7     | 26.0                 | 27.1     |
| Mean in CHIP Expansion Only States   | 17.5            | 15.1     | 24.2                 | 24.2     |
| Mean in CHIP Combination States      | 17.1            | 17.2     | 24.9                 | 26.9     |

Source: The summary statistics displayed in this table were produced from the data presented in Appendix Table 4a.

**Appendix Table 5. Logistic Regression Coefficients Predicting False-Negative Reports for Children and Adults, Demographics and State Dummy Models**

|                             | Children<br>(Age 0-18) |      |         | Adults<br>(Age 19+) |      |         |
|-----------------------------|------------------------|------|---------|---------------------|------|---------|
|                             | Est.                   | SE   | P-Value | Est.                | SE   | P-Value |
| <b>Demographic Controls</b> |                        |      |         |                     |      |         |
| White, non-Hispanic         | REF                    |      |         | REF                 |      |         |
| Black, non-Hispanic         | 0.20                   | 0.03 | 0.000   | 0.33                | 0.02 | 0.000   |
| AIAN, non-Hispanic          | 0.43                   | 0.08 | 0.000   | 0.43                | 0.07 | 0.000   |
| Asian/NHOPI, non-Hispanic   | 0.42                   | 0.05 | 0.000   | 0.25                | 0.03 | 0.000   |
| Other/Mult, non-Hispanic    | -0.05                  | 0.15 | 0.761   | 0.59                | 0.14 | 0.000   |
| Hispanic, any race          | 0.18                   | 0.02 | 0.000   | 0.48                | 0.02 | 0.000   |
| Female                      | REF                    |      |         | REF                 |      |         |
| Male                        | 0.00                   | 0.01 | 0.752   | 0.11                | 0.01 | 0.000   |
| 0-138 FPL                   | REF                    |      |         | REF                 |      |         |
| 139-249 FPL                 | 0.88                   | 0.02 | 0.000   | 0.54                | 0.02 | 0.000   |
| 250-399 FPL                 | 1.34                   | 0.03 | 0.000   | 0.72                | 0.02 | 0.000   |
| 400+ FPL                    | 1.66                   | 0.04 | 0.000   | 0.71                | 0.03 | 0.000   |
| NIU FPL                     | 0.63                   | 0.06 | 0.000   | 1.79                | 0.11 | 0.000   |
| Non-Citizen                 | REF                    |      |         | REF                 |      |         |
| Citizen                     | -0.74                  | 0.07 | 0.000   | -0.54               | 0.02 | 0.000   |
| LT High School              | REF                    |      |         | REF                 |      |         |
| HS or GED                   | 0.07                   | 0.03 | 0.011   | 0.04                | 0.02 | 0.034   |
| More than HS                | 0.14                   | 0.03 | 0.000   | 0.05                | 0.02 | 0.008   |
| Employed                    | REF                    |      |         | REF                 |      |         |
| Unemployed                  | -0.27                  | 0.08 | 0.001   | -0.12               | 0.04 | 0.001   |
| Not in labor force          | -0.51                  | 0.03 | 0.000   | -0.33               | 0.02 | 0.000   |
| <b>State Dummies</b>        |                        |      |         |                     |      |         |
| ALABAMA                     | -0.34                  | 0.20 | 0.091   | -0.16               | 0.22 | 0.474   |
| ALASKA                      | -0.47                  | 0.23 | 0.046   | -0.51               | 0.25 | 0.049   |
| ARIZONA                     | 0.18                   | 0.19 | 0.333   | 0.32                | 0.20 | 0.113   |
| ARKANSAS                    | -0.34                  | 0.17 | 0.056   | 0.14                | 0.21 | 0.524   |
| CALIFORNIA                  | 0.07                   | 0.16 | 0.676   | -0.03               | 0.20 | 0.874   |
| COLORADO                    | 0.06                   | 0.18 | 0.764   | 0.30                | 0.22 | 0.177   |
| CONNECTICUT                 | -0.14                  | 0.20 | 0.495   | -0.04               | 0.21 | 0.859   |
| DELAWARE                    | -0.28                  | 0.21 | 0.195   | -0.23               | 0.24 | 0.336   |
| DISTRICT OF COLUMBIA        | -0.18                  | 0.25 | 0.468   | -0.41               | 0.27 | 0.125   |
| FLORIDA                     | 0.30                   | 0.17 | 0.087   | 0.20                | 0.20 | 0.329   |
| GEORGIA                     | 0.27                   | 0.17 | 0.126   | 0.44                | 0.21 | 0.040   |
| HAWAII                      | -0.33                  | 0.22 | 0.135   | 0.08                | 0.23 | 0.739   |
| IDAHO                       | -0.03                  | 0.20 | 0.883   | 0.08                | 0.23 | 0.740   |
| ILLINOIS                    | 0.00                   | 0.17 | 0.999   | 0.38                | 0.21 | 0.072   |
| INDIANA                     | 0.17                   | 0.18 | 0.329   | 0.34                | 0.22 | 0.119   |
| IOWA                        | -0.01                  | 0.19 | 0.940   | 0.02                | 0.23 | 0.945   |
| KANSAS                      | 0.10                   | 0.20 | 0.607   | 0.01                | 0.23 | 0.962   |
| KENTUCKY                    | -0.12                  | 0.17 | 0.482   | 0.09                | 0.20 | 0.659   |

|                  |       |      |       |       |      |       |
|------------------|-------|------|-------|-------|------|-------|
| LOUISIANA        | 0.00  | 0.18 | 0.993 | 0.43  | 0.21 | 0.048 |
| MAINE            | -0.60 | 0.20 | 0.003 | -0.38 | 0.21 | 0.067 |
| MARYLAND         | -0.01 | 0.18 | 0.941 | 0.25  | 0.20 | 0.209 |
| MASSACHUSETTS    | -0.48 | 0.19 | 0.014 | -0.42 | 0.21 | 0.051 |
| MICHIGAN         | -0.13 | 0.17 | 0.455 | -0.14 | 0.21 | 0.501 |
| MINNESOTA        | 0.01  | 0.17 | 0.946 | -0.08 | 0.20 | 0.709 |
| MISSISSIPPI      | -0.09 | 0.19 | 0.636 | 0.01  | 0.20 | 0.967 |
| MISSOURI         | -0.11 | 0.18 | 0.521 | 0.11  | 0.22 | 0.603 |
| MONTANA          | 0.14  | 0.26 | 0.588 | 0.33  | 0.26 | 0.199 |
| NEBRASKA         | -0.43 | 0.20 | 0.041 | -0.15 | 0.25 | 0.555 |
| NEVADA           | 0.49  | 0.24 | 0.040 | 0.32  | 0.23 | 0.167 |
| NEW HAMPSHIRE    | -0.22 | 0.23 | 0.340 | 0.00  | 0.27 | 0.996 |
| NEW JERSEY       | 0.28  | 0.17 | 0.091 | 0.06  | 0.21 | 0.765 |
| NEW MEXICO       | 0.01  | 0.18 | 0.956 | 0.16  | 0.21 | 0.450 |
| NEW YORK         | -0.25 | 0.17 | 0.129 | -0.27 | 0.20 | 0.190 |
| NORTH CAROLINA   | -0.16 | 0.19 | 0.402 | 0.02  | 0.21 | 0.941 |
| NORTH DAKOTA     | 0.03  | 0.28 | 0.901 | 0.00  | 0.30 | 0.995 |
| OHIO             | 0.01  | 0.17 | 0.963 | -0.08 | 0.20 | 0.697 |
| OKLAHOMA         | -0.03 | 0.17 | 0.867 | 0.56  | 0.20 | 0.007 |
| OREGON           | -0.06 | 0.19 | 0.761 | 0.17  | 0.23 | 0.469 |
| PENNSYLVANIA     | -0.01 | 0.17 | 0.963 | 0.09  | 0.21 | 0.662 |
| RHODE ISLAND     | 0.37  | 0.22 | 0.105 | 0.05  | 0.23 | 0.832 |
| SOUTH CAROLINA   | -0.08 | 0.17 | 0.659 | -0.11 | 0.20 | 0.607 |
| SOUTH DAKOTA     | REF   |      |       | REF   |      |       |
| TENNESSEE        | 0.17  | 0.17 | 0.323 | 0.31  | 0.21 | 0.142 |
| TEXAS            | 0.15  | 0.17 | 0.390 | 0.28  | 0.21 | 0.190 |
| UTAH             | -0.09 | 0.22 | 0.671 | 0.02  | 0.22 | 0.928 |
| VERMONT          | -0.67 | 0.25 | 0.010 | -0.52 | 0.24 | 0.031 |
| VIRGINIA         | 0.34  | 0.18 | 0.057 | -0.03 | 0.21 | 0.904 |
| WASHINGTON       | -0.01 | 0.17 | 0.968 | -0.09 | 0.22 | 0.695 |
| WEST VIRGINIA    | -0.11 | 0.18 | 0.533 | -0.08 | 0.20 | 0.679 |
| WISCONSIN        | -0.18 | 0.18 | 0.325 | 0.28  | 0.21 | 0.200 |
| WYOMING          | 0.28  | 0.24 | 0.246 | 0.19  | 0.29 | 0.516 |
| <b>Intercept</b> | -1.03 | 0.18 | 0.000 | -0.92 | 0.21 | 0.000 |

Source: Re-weighted estimates from the 2009 linked ACS-MSIS. South Dakota was chosen as the referent category because it had the median unadjusted false-negative rate.

**Appendix Table 6. Logistic Regression Coefficients Predicting False-Negative Reports for Children and Adults, Demographics and State Program Characteristics Models**

|                                      | Children<br>(Age 0-18) |      |         | Adults<br>(Age 19+) |      |         |
|--------------------------------------|------------------------|------|---------|---------------------|------|---------|
|                                      | Est.                   | SE   | P-Value | Est.                | SE   | P-Value |
| <b>Demographic Controls</b>          |                        |      |         |                     |      |         |
| White, non-Hispanic                  | REF                    |      |         | REF                 |      |         |
| Black, non-Hispanic                  | 0.22                   | 0.02 | 0.000   | 0.34                | 0.02 | 0.000   |
| AIAN, non-Hispanic                   | 0.40                   | 0.07 | 0.000   | 0.46                | 0.06 | 0.000   |
| Asian/NHOPI, non-Hispanic            | 0.42                   | 0.05 | 0.000   | 0.25                | 0.03 | 0.000   |
| Other/Mult, non-Hispanic             | -0.01                  | 0.15 | 0.959   | 0.56                | 0.14 | 0.000   |
| Hispanic, any race                   | 0.23                   | 0.02 | 0.000   | 0.51                | 0.02 | 0.000   |
| Female                               | REF                    |      |         | REF                 |      |         |
| Male                                 | 0.00                   | 0.01 | 0.760   | 0.10                | 0.01 | 0.000   |
| 0-138 FPL                            | REF                    |      |         | REF                 |      |         |
| 139-249 FPL                          | 0.88                   | 0.02 | 0.000   | 0.55                | 0.02 | 0.000   |
| 250-399 FPL                          | 1.35                   | 0.03 | 0.000   | 0.73                | 0.02 | 0.000   |
| 400+ FPL                             | 1.66                   | 0.04 | 0.000   | 0.71                | 0.03 | 0.000   |
| NIU FPL                              | 0.62                   | 0.06 | 0.000   | 1.74                | 0.11 | 0.000   |
| Non-Citizen                          | REF                    |      |         | REF                 |      |         |
| Citizen                              | -0.75                  | 0.06 | 0.000   | -0.53               | 0.02 | 0.000   |
| LT High School                       | REF                    |      |         | REF                 |      |         |
| HS or GED                            | 0.07                   | 0.03 | 0.007   | 0.05                | 0.02 | 0.014   |
| More than HS                         | 0.15                   | 0.03 | 0.000   | 0.06                | 0.02 | 0.002   |
| Employed                             | REF                    |      |         | REF                 |      |         |
| Unemployed                           | -0.26                  | 0.08 | 0.002   | -0.12               | 0.04 | 0.002   |
| Not in labor force                   | -0.50                  | 0.03 | 0.000   | -0.33               | 0.02 | 0.000   |
| <b>Program Name</b>                  |                        |      |         |                     |      |         |
| Simple                               | REF                    |      |         | REF                 |      |         |
| Complex                              | -0.06                  | 0.02 | 0.018   | 0.15                | 0.02 | 0.000   |
| <b>Child Income Eligibility</b>      |                        |      |         |                     |      |         |
| High                                 | REF                    |      |         | REF                 |      |         |
| Low                                  | 0.07                   | 0.03 | 0.010   | 0.18                | 0.03 | 0.000   |
| Medium                               | 0.13                   | 0.03 | 0.000   | 0.19                | 0.03 | 0.000   |
| <b>Parent Income Eligibility</b>     |                        |      |         |                     |      |         |
| High                                 | REF                    |      |         | REF                 |      |         |
| Low                                  | -0.09                  | 0.04 | 0.011   | 0.01                | 0.03 | 0.657   |
| Medium                               | 0.04                   | 0.03 | 0.243   | -0.04               | 0.02 | 0.067   |
| <b>Coverage for Childless Adults</b> |                        |      |         |                     |      |         |
| No                                   | REF                    |      |         | REF                 |      |         |
| Yes                                  | -0.12                  | 0.03 | 0.000   | -0.24               | 0.03 | 0.000   |
| <b>CHIP Type</b>                     |                        |      |         |                     |      |         |
| Combination                          | REF                    |      |         | REF                 |      |         |
| Expansion                            | -0.13                  | 0.04 | 0.002   | -0.14               | 0.04 | 0.000   |



|                                       |       |      |       |       |      |       |
|---------------------------------------|-------|------|-------|-------|------|-------|
| Stand Alone                           | 0.01  | 0.02 | 0.523 | 0.06  | 0.02 | 0.011 |
| <b>Presumptive Eligibility Policy</b> |       |      |       |       |      |       |
| None                                  | REF   |      |       | REF   |      |       |
| Pregnant Women Only                   | -0.04 | 0.03 | 0.162 | 0.01  | 0.03 | 0.561 |
| Pregnant Women and Children           | -0.15 | 0.03 | 0.000 | -0.06 | 0.03 | 0.018 |
| <b>Intercept</b>                      | -0.94 | 0.08 | 0.000 | -1.03 | 0.05 | 0.000 |

Source: Re-weighted estimates from the 2009 linked ACS-MSIS. State program characteristics data comes from Kaiser, 2009.

**Appendix Table 7. Nested Logistic Regression of No Medicaid Plus Among Linked Cases**

|                           | Model 1 |      |         | Model 2 |      |         | Model 3 |      |         |
|---------------------------|---------|------|---------|---------|------|---------|---------|------|---------|
|                           | Coef    | SE   | P-Value | Coef    | SE   | P-Value | Coef    | SE   | P-Value |
| <b>Block 1</b>            |         |      |         |         |      |         |         |      |         |
| Intercept                 | -1.96   | 0.01 | 0.000   | -2.20   | 0.04 | 0.000   | -2.12   | 0.06 | 0.000   |
| Age 0-18                  | Ref     |      |         | Ref     |      |         | Ref     |      |         |
| Age 19-64                 | 0.49    | 0.01 | 0.000   | 0.51    | 0.01 | 0.000   | 0.51    | 0.01 | 0.000   |
| Age 65+                   | 0.34    | 0.01 | 0.000   | 0.36    | 0.01 | 0.000   | 0.36    | 0.01 | 0.000   |
| White, non-Hispanic       | Ref     |      |         | Ref     |      |         | Ref     |      |         |
| Black, non-Hispanic       | 0.29    | 0.01 | 0.000   | 0.27    | 0.01 | 0.000   | 0.27    | 0.01 | 0.000   |
| AIAN, non-Hispanic        | 0.42    | 0.04 | 0.000   | 0.40    | 0.04 | 0.000   | 0.40    | 0.04 | 0.000   |
| Asian/NHOPI, non-Hispanic | 0.32    | 0.02 | 0.000   | 0.36    | 0.02 | 0.000   | 0.36    | 0.02 | 0.000   |
| Other/Mult, non-Hispanic  | 0.40    | 0.08 | 0.000   | 0.43    | 0.08 | 0.000   | 0.43    | 0.08 | 0.000   |
| Hispanic, any race        | 0.37    | 0.01 | 0.000   | 0.35    | 0.01 | 0.000   | 0.35    | 0.01 | 0.000   |
| FPL 0-138                 | Ref     |      |         | Ref     |      |         | Ref     |      |         |
| FPL 139-249               | 0.76    | 0.01 | 0.000   | 0.76    | 0.01 | 0.000   | 0.76    | 0.01 | 0.000   |
| FPL 250-400               | 1.10    | 0.01 | 0.000   | 1.10    | 0.01 | 0.000   | 1.10    | 0.01 | 0.000   |
| FPL 400+                  | 1.20    | 0.02 | 0.000   | 1.20    | 0.02 | 0.000   | 1.20    | 0.02 | 0.000   |
| Not in Poverty            |         |      |         |         |      |         |         |      |         |
| Universe                  | 0.46    | 0.04 | 0.000   | 0.46    | 0.04 | 0.000   | 0.46    | 0.04 | 0.000   |
| Year 2008                 | Ref     |      |         | Ref     |      |         | Ref     |      |         |
| Year 2009                 | -0.13   | 0.01 | 0.000   | -0.13   | 0.01 | 0.000   | -0.31   | 0.07 | 0.000   |
| F Test for Block 1        | 13272   |      | 0.000   |         |      |         |         |      |         |
| <b>Block 2</b>            |         |      |         |         |      |         |         |      |         |
| AL                        |         |      |         | Ref     |      |         | Ref     |      |         |
| AK                        |         |      |         | -0.17   | 0.09 | 0.060   | -0.18   | 0.13 | 0.146   |
| AZ                        |         |      |         | 0.47    | 0.05 | 0.000   | 0.39    | 0.07 | 0.000   |
| AR                        |         |      |         | -0.01   | 0.06 | 0.918   | -0.12   | 0.09 | 0.155   |
| CA                        |         |      |         | 0.20    | 0.04 | 0.000   | 0.09    | 0.06 | 0.123   |
| CO                        |         |      |         | 0.42    | 0.06 | 0.000   | 0.42    | 0.08 | 0.000   |
| CT                        |         |      |         | 0.15    | 0.06 | 0.014   | 0.08    | 0.09 | 0.347   |
| DE                        |         |      |         | -0.03   | 0.10 | 0.777   | -0.08   | 0.15 | 0.600   |
| DC                        |         |      |         | -0.20   | 0.11 | 0.080   | -0.37   | 0.14 | 0.013   |
| FL                        |         |      |         | 0.47    | 0.04 | 0.000   | 0.39    | 0.06 | 0.000   |
| GA                        |         |      |         | 0.47    | 0.05 | 0.000   | 0.33    | 0.06 | 0.000   |
| HI                        |         |      |         | 0.18    | 0.07 | 0.018   | 0.19    | 0.12 | 0.116   |
| ID                        |         |      |         | 0.34    | 0.08 | 0.000   | 0.37    | 0.11 | 0.001   |
| IL                        |         |      |         | 0.39    | 0.05 | 0.000   | 0.32    | 0.06 | 0.000   |
| IN                        |         |      |         | 0.43    | 0.05 | 0.000   | 0.34    | 0.07 | 0.000   |
| IA                        |         |      |         | 0.19    | 0.05 | 0.000   | 0.09    | 0.07 | 0.238   |
| KS                        |         |      |         | 0.22    | 0.06 | 0.000   | 0.10    | 0.09 | 0.257   |
| KY                        |         |      |         | 0.03    | 0.06 | 0.580   | -0.18   | 0.08 | 0.038   |
| LA                        |         |      |         | 0.30    | 0.04 | 0.000   | 0.15    | 0.06 | 0.015   |
| ME                        |         |      |         | -0.26   | 0.07 | 0.001   | -0.35   | 0.10 | 0.001   |

|                    |       |      |       |       |      |       |
|--------------------|-------|------|-------|-------|------|-------|
| MD                 | 0.30  | 0.05 | 0.000 | 0.19  | 0.08 | 0.016 |
| MA                 | -0.13 | 0.05 | 0.018 | -0.12 | 0.07 | 0.105 |
| MI                 | 0.06  | 0.04 | 0.191 | -0.03 | 0.06 | 0.594 |
| MN                 | 0.22  | 0.06 | 0.000 | 0.17  | 0.07 | 0.013 |
| MS                 | 0.15  | 0.06 | 0.009 | 0.08  | 0.09 | 0.388 |
| MO                 | 0.15  | 0.05 | 0.002 | 0.04  | 0.07 | 0.624 |
| MT                 | 0.28  | 0.10 | 0.006 | 0.08  | 0.14 | 0.596 |
| NE                 | -0.11 | 0.08 | 0.201 | -0.19 | 0.10 | 0.057 |
| NV                 | 0.65  | 0.09 | 0.000 | 0.62  | 0.13 | 0.000 |
| NH                 | 0.18  | 0.09 | 0.057 | 0.17  | 0.14 | 0.203 |
| NJ                 | 0.38  | 0.06 | 0.000 | 0.29  | 0.08 | 0.000 |
| NM                 | 0.23  | 0.08 | 0.004 | 0.11  | 0.11 | 0.318 |
| NY                 | 0.00  | 0.04 | 0.946 | -0.06 | 0.06 | 0.319 |
| NC                 | 0.11  | 0.05 | 0.021 | 0.02  | 0.06 | 0.767 |
| ND                 | 0.35  | 0.12 | 0.004 | 0.33  | 0.17 | 0.050 |
| OH                 | 0.24  | 0.05 | 0.000 | 0.24  | 0.06 | 0.000 |
| OK                 | 0.40  | 0.05 | 0.000 | 0.28  | 0.07 | 0.000 |
| OR                 | 0.21  | 0.08 | 0.011 | 0.08  | 0.12 | 0.515 |
| PA                 | 0.24  | 0.04 | 0.000 | 0.16  | 0.06 | 0.011 |
| RI                 | 0.29  | 0.08 | 0.001 | 0.05  | 0.12 | 0.687 |
| SC                 | 0.26  | 0.06 | 0.000 | 0.33  | 0.07 | 0.000 |
| SD                 | 0.05  | 0.12 | 0.678 | -0.26 | 0.16 | 0.104 |
| TN                 | 0.42  | 0.05 | 0.000 | 0.34  | 0.07 | 0.000 |
| TX                 | 0.36  | 0.04 | 0.000 | 0.27  | 0.06 | 0.000 |
| UT                 | 0.29  | 0.08 | 0.000 | 0.35  | 0.11 | 0.002 |
| VT                 | -0.50 | 0.09 | 0.000 | -0.72 | 0.12 | 0.000 |
| VA                 | 0.39  | 0.06 | 0.000 | 0.32  | 0.08 | 0.000 |
| WA                 | 0.29  | 0.06 | 0.000 | 0.28  | 0.08 | 0.001 |
| WV                 | 0.06  | 0.06 | 0.354 | -0.05 | 0.09 | 0.570 |
| WI                 | 0.19  | 0.05 | 0.000 | -0.06 | 0.08 | 0.425 |
| WY                 | 0.35  | 0.11 | 0.002 | 0.15  | 0.17 | 0.382 |
| F Test for Block 2 | 22    |      | 0.000 |       |      |       |
| <b>Block 3</b>     |       |      |       |       |      |       |
| AL*2009            |       |      |       | Ref   |      |       |
| AK*2009            |       |      |       | 0.02  | 0.18 | 0.900 |
| AZ*2009            |       |      |       | 0.16  | 0.10 | 0.104 |
| AR*2009            |       |      |       | 0.24  | 0.12 | 0.047 |
| CA*2009            |       |      |       | 0.23  | 0.07 | 0.003 |
| CO*2009            |       |      |       | 0.02  | 0.13 | 0.888 |
| CT*2009            |       |      |       | 0.14  | 0.14 | 0.307 |
| DE*2009            |       |      |       | 0.10  | 0.19 | 0.596 |
| DC*2009            |       |      |       | 0.34  | 0.19 | 0.082 |
| FL*2009            |       |      |       | 0.18  | 0.08 | 0.031 |
| GA*2009            |       |      |       | 0.28  | 0.09 | 0.003 |
| HI*2009            |       |      |       | -0.01 | 0.16 | 0.959 |
| ID*2009            |       |      |       | -0.07 | 0.15 | 0.655 |
| IL*2009            |       |      |       | 0.15  | 0.08 | 0.049 |

|                    |  |  |       |      |       |
|--------------------|--|--|-------|------|-------|
| IN*2009            |  |  | 0.17  | 0.08 | 0.038 |
| IA*2009            |  |  | 0.21  | 0.09 | 0.027 |
| KS*2009            |  |  | 0.23  | 0.12 | 0.053 |
| KY*2009            |  |  | 0.42  | 0.11 | 0.000 |
| LA*2009            |  |  | 0.30  | 0.08 | 0.001 |
| ME*2009            |  |  | 0.17  | 0.13 | 0.193 |
| MD*2009            |  |  | 0.22  | 0.11 | 0.056 |
| MA*2009            |  |  | -0.03 | 0.10 | 0.794 |
| MI*2009            |  |  | 0.18  | 0.08 | 0.025 |
| MN*2009            |  |  | 0.11  | 0.09 | 0.240 |
| MS*2009            |  |  | 0.14  | 0.13 | 0.282 |
| MO*2009            |  |  | 0.23  | 0.11 | 0.030 |
| MT*2009            |  |  | 0.41  | 0.18 | 0.024 |
| NE*2009            |  |  | 0.17  | 0.15 | 0.268 |
| NV*2009            |  |  | 0.07  | 0.17 | 0.703 |
| NH*2009            |  |  | 0.01  | 0.18 | 0.952 |
| NJ*2009            |  |  | 0.20  | 0.10 | 0.043 |
| NM*2009            |  |  | 0.23  | 0.13 | 0.079 |
| NY*2009            |  |  | 0.13  | 0.08 | 0.118 |
| NC*2009            |  |  | 0.19  | 0.08 | 0.025 |
| ND*2009            |  |  | 0.04  | 0.25 | 0.868 |
| OH*2009            |  |  | 0.00  | 0.08 | 0.997 |
| OK*2009            |  |  | 0.23  | 0.10 | 0.020 |
| OR*2009            |  |  | 0.26  | 0.13 | 0.048 |
| PA*2009            |  |  | 0.18  | 0.08 | 0.031 |
| RI*2009            |  |  | 0.46  | 0.19 | 0.020 |
| SC*2009            |  |  | -0.16 | 0.10 | 0.134 |
| SD*2009            |  |  | 0.59  | 0.23 | 0.013 |
| TN*2009            |  |  | 0.17  | 0.09 | 0.063 |
| TX*2009            |  |  | 0.17  | 0.07 | 0.026 |
| UT*2009            |  |  | -0.11 | 0.16 | 0.508 |
| VT*2009            |  |  | 0.44  | 0.18 | 0.015 |
| VA*2009            |  |  | 0.15  | 0.09 | 0.108 |
| WA*2009            |  |  | 0.01  | 0.11 | 0.962 |
| WV*2009            |  |  | 0.22  | 0.12 | 0.072 |
| WI*2009            |  |  | 0.44  | 0.10 | 0.000 |
| WY*2009            |  |  | 0.40  | 0.23 | 0.090 |
| F Test for Block 3 |  |  | 4.00  |      | 0.000 |

Source: Re-weighted estimates from the 2008 and 2009 linked ACS-MSIS.

**Appendix Table 8. Nested Logistic Regression of Uninsurance Among Linked Cases**

|                           | Model 1 |      |         | Model 2 |      |         | Model 3 |      |         |
|---------------------------|---------|------|---------|---------|------|---------|---------|------|---------|
|                           | Coef.   | SE   | P-Value | Coef.   | SE   | P-Value | Coef.   | SE   | P-Value |
| <b>Block 1</b>            |         |      |         |         |      |         |         |      |         |
| Intercept                 | -2.92   | 0.02 | 0.000   | -3.24   | 0.07 | 0.000   | -3.15   | 0.11 | 0.000   |
| Age 0-18                  | Ref     |      |         | Ref     |      |         | Ref     |      |         |
| Age 19-64                 | 0.80    | 0.01 | 0.000   | 0.88    | 0.01 | 0.000   | 0.88    | 0.01 | 0.000   |
| Age 65+                   | -1.76   | 0.06 | 0.000   | -1.75   | 0.06 | 0.000   | -1.75   | 0.06 | 0.000   |
| White, non-Hispanic       | Ref     |      |         | Ref     |      |         | Ref     |      |         |
| Black, non-Hispanic       | 0.21    | 0.02 | 0.000   | 0.16    | 0.02 | 0.000   | 0.16    | 0.02 | 0.000   |
| AIAN, non-Hispanic        | 0.92    | 0.05 | 0.000   | 0.85    | 0.05 | 0.000   | 0.85    | 0.05 | 0.000   |
| Asian/NHOPI, non-Hispanic | 0.37    | 0.03 | 0.000   | 0.49    | 0.04 | 0.000   | 0.49    | 0.04 | 0.000   |
| Other/Mult, non-Hispanic  | 0.29    | 0.15 | 0.047   | 0.40    | 0.15 | 0.009   | 0.40    | 0.15 | 0.007   |
| Hispanic, any race        | 0.83    | 0.02 | 0.000   | 0.77    | 0.02 | 0.000   | 0.77    | 0.02 | 0.000   |
| FPL 0-138                 | Ref     |      |         | Ref     |      |         | Ref     |      |         |
| FPL 139-249               | 0.27    | 0.02 | 0.000   | 0.28    | 0.02 | 0.000   | 0.28    | 0.02 | 0.000   |
| FPL 250-400               | 0.22    | 0.02 | 0.000   | 0.23    | 0.02 | 0.000   | 0.23    | 0.02 | 0.000   |
| FPL 400+                  | 0.09    | 0.03 | 0.004   | 0.12    | 0.03 | 0.000   | 0.12    | 0.03 | 0.000   |
| Not in Poverty Universe   | 0.03    | 0.07 | 0.627   | 0.05    | 0.07 | 0.469   | 0.05    | 0.07 | 0.468   |
| Year 2008                 | Ref     |      |         | Ref     |      |         | Ref     |      |         |
| Year 2009                 | -0.12   | 0.01 | 0.000   | -0.12   | 0.01 | 0.000   | -0.29   | 0.12 | 0.019   |
| F Test for Block 1        | 442     |      | 0.000   |         |      |         |         |      |         |
| <b>Block 2</b>            |         |      |         |         |      |         |         |      |         |
| AL                        |         |      |         | Ref     |      |         | Ref     |      |         |
| AK                        |         |      |         | 0.21    | 0.14 | 0.138   | 0.08    | 0.19 | 0.675   |
| AZ                        |         |      |         | 0.59    | 0.08 | 0.000   | 0.59    | 0.11 | 0.000   |
| AR                        |         |      |         | 0.22    | 0.10 | 0.028   | 0.14    | 0.14 | 0.299   |
| CA                        |         |      |         | 0.24    | 0.08 | 0.002   | 0.12    | 0.10 | 0.234   |
| CO                        |         |      |         | 0.73    | 0.10 | 0.000   | 0.73    | 0.14 | 0.000   |
| CT                        |         |      |         | -0.23   | 0.11 | 0.035   | -0.39   | 0.15 | 0.011   |
| DE                        |         |      |         | -0.02   | 0.17 | 0.898   | 0.02    | 0.24 | 0.917   |
| DC                        |         |      |         | -0.83   | 0.18 | 0.000   | -0.99   | 0.30 | 0.001   |
| FL                        |         |      |         | 0.81    | 0.08 | 0.000   | 0.74    | 0.11 | 0.000   |
| GA                        |         |      |         | 0.78    | 0.08 | 0.000   | 0.60    | 0.11 | 0.000   |
| HI                        |         |      |         | -0.55   | 0.14 | 0.000   | -0.71   | 0.23 | 0.003   |
| ID                        |         |      |         | 0.62    | 0.12 | 0.000   | 0.61    | 0.15 | 0.000   |
| IL                        |         |      |         | 0.26    | 0.08 | 0.002   | 0.16    | 0.12 | 0.169   |
| IN                        |         |      |         | 0.63    | 0.08 | 0.000   | 0.58    | 0.12 | 0.000   |
| IA                        |         |      |         | 0.17    | 0.10 | 0.083   | 0.05    | 0.15 | 0.720   |
| KS                        |         |      |         | 0.35    | 0.11 | 0.002   | 0.31    | 0.18 | 0.086   |
| KY                        |         |      |         | 0.15    | 0.10 | 0.140   | -0.05   | 0.14 | 0.738   |

|                       |       |      |       |       |      |       |
|-----------------------|-------|------|-------|-------|------|-------|
| LA                    | 0.53  | 0.08 | 0.000 | 0.35  | 0.11 | 0.001 |
| ME                    | -0.30 | 0.11 | 0.007 | -0.27 | 0.15 | 0.082 |
| MD                    | 0.26  | 0.09 | 0.007 | 0.18  | 0.12 | 0.142 |
| MA                    | -1.18 | 0.09 | 0.000 | -1.26 | 0.14 | 0.000 |
| MI                    | 0.05  | 0.08 | 0.527 | -0.05 | 0.11 | 0.677 |
| MN                    | 0.10  | 0.09 | 0.279 | -0.01 | 0.14 | 0.948 |
| MS                    | 0.55  | 0.10 | 0.000 | 0.52  | 0.13 | 0.000 |
| MO                    | 0.30  | 0.08 | 0.000 | 0.24  | 0.12 | 0.045 |
| MT                    | 0.27  | 0.18 | 0.125 | 0.15  | 0.24 | 0.542 |
| NE                    | 0.06  | 0.14 | 0.685 | -0.16 | 0.18 | 0.398 |
| NV                    | 0.90  | 0.11 | 0.000 | 0.97  | 0.18 | 0.000 |
| NH                    | 0.02  | 0.13 | 0.878 | 0.13  | 0.19 | 0.491 |
| NJ                    | 0.33  | 0.09 | 0.001 | 0.24  | 0.12 | 0.058 |
| NM                    | 0.35  | 0.11 | 0.001 | 0.28  | 0.15 | 0.067 |
| NY                    | -0.19 | 0.08 | 0.018 | -0.29 | 0.12 | 0.015 |
| NC                    | 0.36  | 0.08 | 0.000 | 0.25  | 0.11 | 0.029 |
| ND                    | 0.25  | 0.16 | 0.134 | 0.14  | 0.27 | 0.607 |
| OH                    | 0.21  | 0.09 | 0.018 | 0.23  | 0.12 | 0.056 |
| OK                    | 0.48  | 0.10 | 0.000 | 0.39  | 0.12 | 0.002 |
| OR                    | 0.33  | 0.12 | 0.006 | 0.17  | 0.19 | 0.376 |
| PA                    | -0.16 | 0.08 | 0.044 | -0.23 | 0.11 | 0.047 |
| RI                    | -0.36 | 0.15 | 0.016 | -0.62 | 0.25 | 0.015 |
| SC                    | 0.42  | 0.10 | 0.000 | 0.50  | 0.13 | 0.000 |
| SD                    | 0.18  | 0.16 | 0.264 | -0.18 | 0.20 | 0.354 |
| TN                    | 0.24  | 0.09 | 0.008 | 0.12  | 0.13 | 0.368 |
| TX                    | 0.71  | 0.07 | 0.000 | 0.61  | 0.11 | 0.000 |
| UT                    | 0.66  | 0.12 | 0.000 | 0.75  | 0.16 | 0.000 |
| VT                    | -0.90 | 0.19 | 0.000 | -1.36 | 0.31 | 0.000 |
| VA                    | 0.46  | 0.09 | 0.000 | 0.41  | 0.13 | 0.003 |
| WA                    | 0.39  | 0.10 | 0.000 | 0.33  | 0.14 | 0.023 |
| WV                    | 0.18  | 0.12 | 0.130 | 0.21  | 0.16 | 0.206 |
| WI                    | -0.09 | 0.08 | 0.306 | -0.22 | 0.12 | 0.071 |
| WY                    | 0.43  | 0.19 | 0.029 | 0.25  | 0.26 | 0.345 |
| F Test for Block<br>2 | 42    |      | 0.000 |       |      |       |
| <b>Block 3</b>        |       |      |       |       |      |       |
| AL*2009               |       |      |       | Ref   |      |       |
| AK*2009               |       |      |       | 0.26  | 0.25 | 0.297 |
| AZ*2009               |       |      |       | -0.03 | 0.15 | 0.815 |
| AR*2009               |       |      |       | 0.17  | 0.16 | 0.305 |
| CA*2009               |       |      |       | 0.24  | 0.12 | 0.046 |
| CO*2009               |       |      |       | 0.01  | 0.19 | 0.963 |
| CT*2009               |       |      |       | 0.32  | 0.20 | 0.128 |
| DE*2009               |       |      |       | -0.10 | 0.30 | 0.745 |
| DC*2009               |       |      |       | 0.33  | 0.44 | 0.449 |
| FL*2009               |       |      |       | 0.15  | 0.13 | 0.261 |
| GA*2009               |       |      |       | 0.35  | 0.15 | 0.019 |
| HI*2009               |       |      |       | 0.33  | 0.28 | 0.241 |
| ID*2009               |       |      |       | 0.02  | 0.20 | 0.918 |

|                  |  |  |       |      |       |
|------------------|--|--|-------|------|-------|
| IL*2009          |  |  | 0.20  | 0.14 | 0.169 |
| IN*2009          |  |  | 0.11  | 0.15 | 0.462 |
| IA*2009          |  |  | 0.23  | 0.19 | 0.222 |
| KS*2009          |  |  | 0.08  | 0.23 | 0.715 |
| KY*2009          |  |  | 0.40  | 0.16 | 0.019 |
| LA*2009          |  |  | 0.35  | 0.13 | 0.009 |
| ME*2009          |  |  | -0.10 | 0.25 | 0.696 |
| MD*2009          |  |  | 0.16  | 0.15 | 0.292 |
| MA*2009          |  |  | 0.18  | 0.19 | 0.339 |
| MI*2009          |  |  | 0.20  | 0.13 | 0.139 |
| MN*2009          |  |  | 0.22  | 0.19 | 0.241 |
| MS*2009          |  |  | 0.06  | 0.15 | 0.685 |
| MO*2009          |  |  | 0.13  | 0.15 | 0.379 |
| MT*2009          |  |  | 0.26  | 0.29 | 0.376 |
| NE*2009          |  |  | 0.41  | 0.26 | 0.116 |
| NV*2009          |  |  | -0.13 | 0.26 | 0.609 |
| NH*2009          |  |  | -0.24 | 0.31 | 0.445 |
| NJ*2009          |  |  | 0.18  | 0.16 | 0.269 |
| NM*2009          |  |  | 0.15  | 0.17 | 0.407 |
| NY*2009          |  |  | 0.20  | 0.14 | 0.151 |
| NC*2009          |  |  | 0.21  | 0.14 | 0.14  |
| ND*2009          |  |  | 0.22  | 0.37 | 0.556 |
| OH*2009          |  |  | -0.04 | 0.13 | 0.75  |
| OK*2009          |  |  | 0.19  | 0.13 | 0.165 |
| OR*2009          |  |  | 0.32  | 0.23 | 0.163 |
| PA*2009          |  |  | 0.14  | 0.16 | 0.365 |
| RI*2009          |  |  | 0.50  | 0.32 | 0.129 |
| SC*2009          |  |  | -0.18 | 0.18 | 0.315 |
| SD*2009          |  |  | 0.68  | 0.28 | 0.018 |
| TN*2009          |  |  | 0.24  | 0.16 | 0.142 |
| TX*2009          |  |  | 0.20  | 0.13 | 0.121 |
| UT*2009          |  |  | -0.18 | 0.22 | 0.429 |
| VT*2009          |  |  | 0.84  | 0.36 | 0.021 |
| VA*2009          |  |  | 0.12  | 0.17 | 0.479 |
| WA*2009          |  |  | 0.13  | 0.18 | 0.467 |
| WV*2009          |  |  | -0.06 | 0.20 | 0.757 |
| WI*2009          |  |  | 0.26  | 0.15 | 0.077 |
| WY*2009          |  |  | 0.36  | 0.34 | 0.299 |
| F Test for Block |  |  |       |      |       |
| 3                |  |  | 1     |      | 0.34  |

Source: Re-weighted estimates from the 2008 and 2009 linked ACS-MSIS.

| <b>Appendix Table 9. False-Positive Error Rate, 2009 ACS/MSIS Linked File</b> |                                             |      |               |      |                                                                 |      |
|-------------------------------------------------------------------------------|---------------------------------------------|------|---------------|------|-----------------------------------------------------------------|------|
|                                                                               | Not enrolled on date of interview, per MSIS |      | Never on MSIS |      | In MSIS (Q4 2008-Q1 2010), but not enrolled on day of interview |      |
| Weighted Count                                                                | 262,576,519                                 |      | 246,425,886   |      | 16,150,633                                                      |      |
|                                                                               | %                                           | SE   | %             | SE   | %                                                               | SE   |
| No Medicaid Plus                                                              | 92.9                                        | 0.02 | 95.2          | 0.02 | 58.3                                                            | 0.21 |
| Medicaid Plus (False-Positive Rate)                                           | 7.1                                         | 0.02 | 4.8           | 0.02 | 41.7                                                            | 0.21 |

Source: Re-weighted estimates from the 2009 ACS, civilian non-institutional population. The false-positive rate is defined as the weighted fraction of cases not found on the MSIS that report Medicaid Plus.
